# Supplementary material for: Binding induced destruction of an excimer in anthracene-linked benzimidazole diamide: a case toward the selective detection of organic sulfonic acids and metal ions
Source: Royal Society of Chemistry journal article supplement (doi:10.1039/b9nj00789j), 2010-01-01
Supplement: b9nj00789j.pdf [file b9nj00789j.pdf]

## Binding induced destruction of excimer in anthracene linked benzimidazole diamide: A case toward selective detection of organic sulphonic acids and metal ions

Kumares Ghosh<sup>a</sup>, Tanushree Sen<sup>a</sup>, Amarendra Patra<sup>b</sup>

<sup>a</sup>Department of Chemistry, university of kalyani, kalyani – 741235, India  
Email: ghosh\_k2003@yahoo.co.in

<sup>b</sup>Department of Chemistry, University College of Science, 92 A.P.C Road, Kolkata 700 009, India

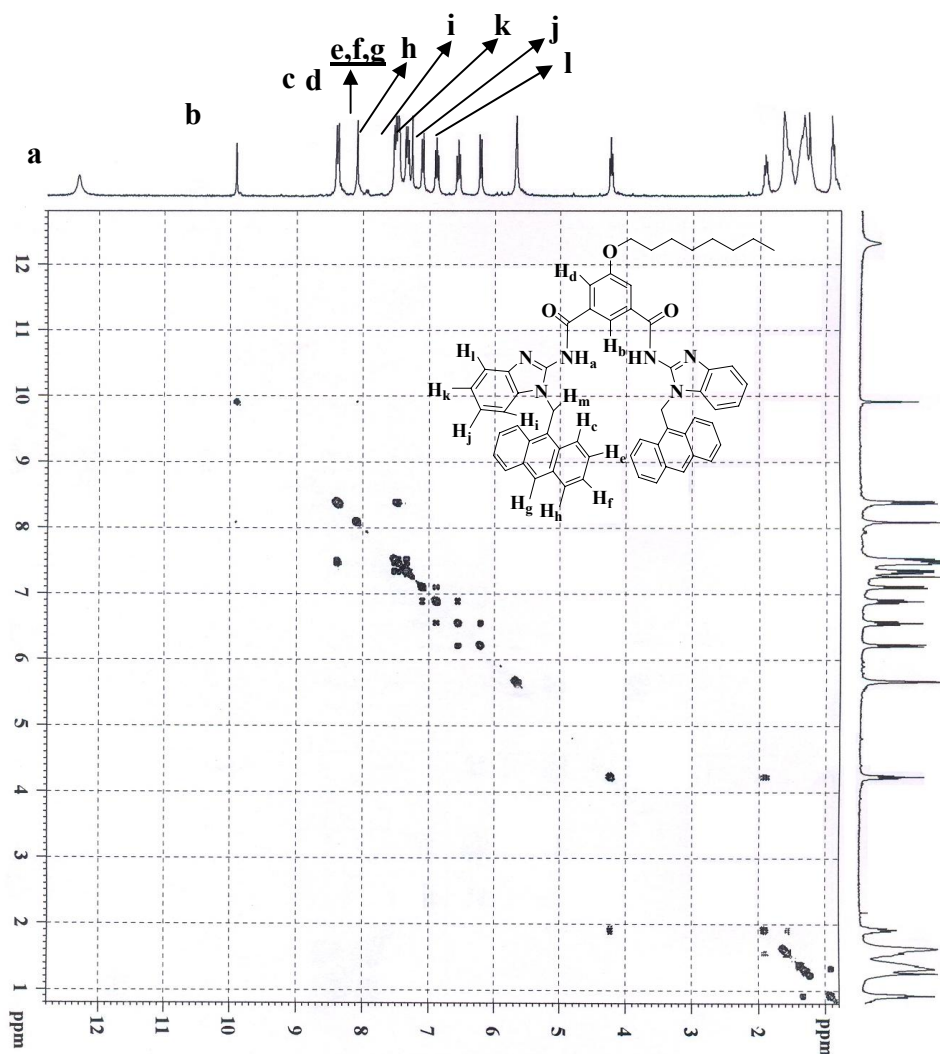

Fig. S1 COSY spectrum (300 MHz) of **1** in CDCl<sub>3</sub>.

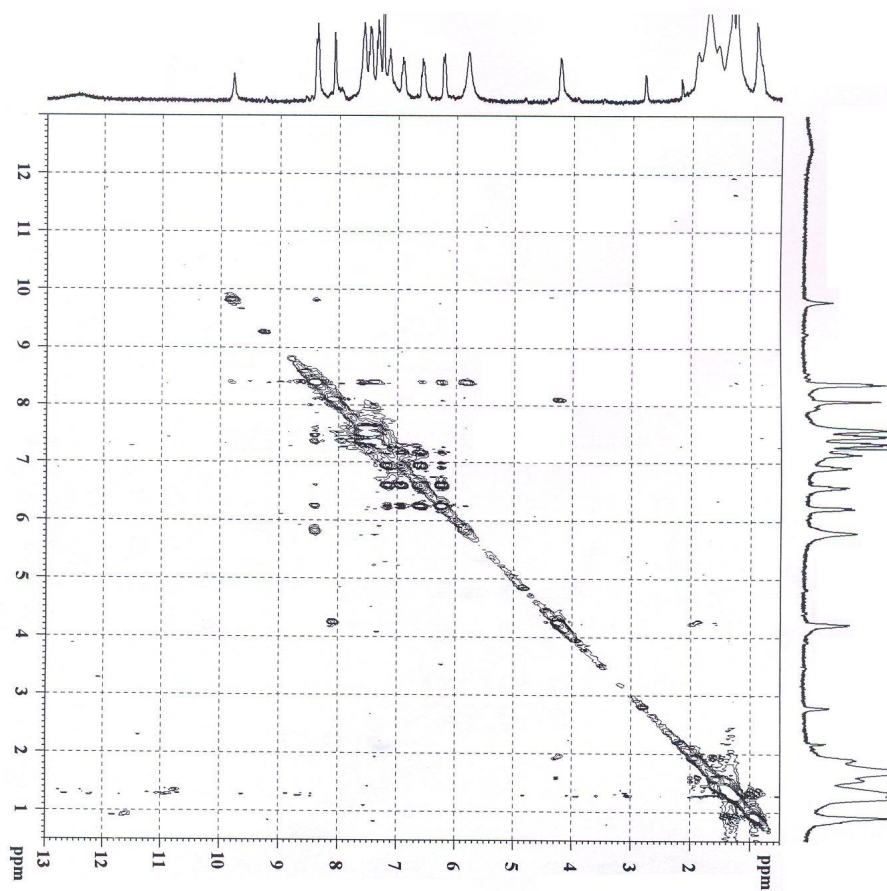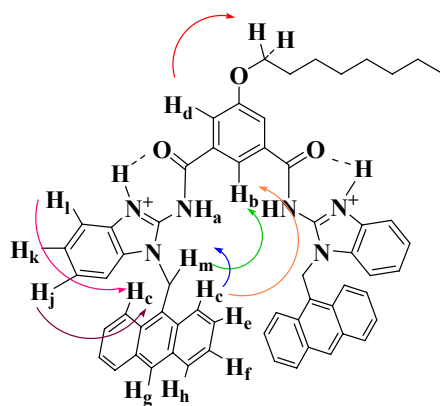

**Fig. S2** ROESY spectrum (300 MHz) of **1** in presence of equivalent amount of  $\text{CH}_3\text{SO}_3\text{H}$  in  $\text{CDCl}_3$ .

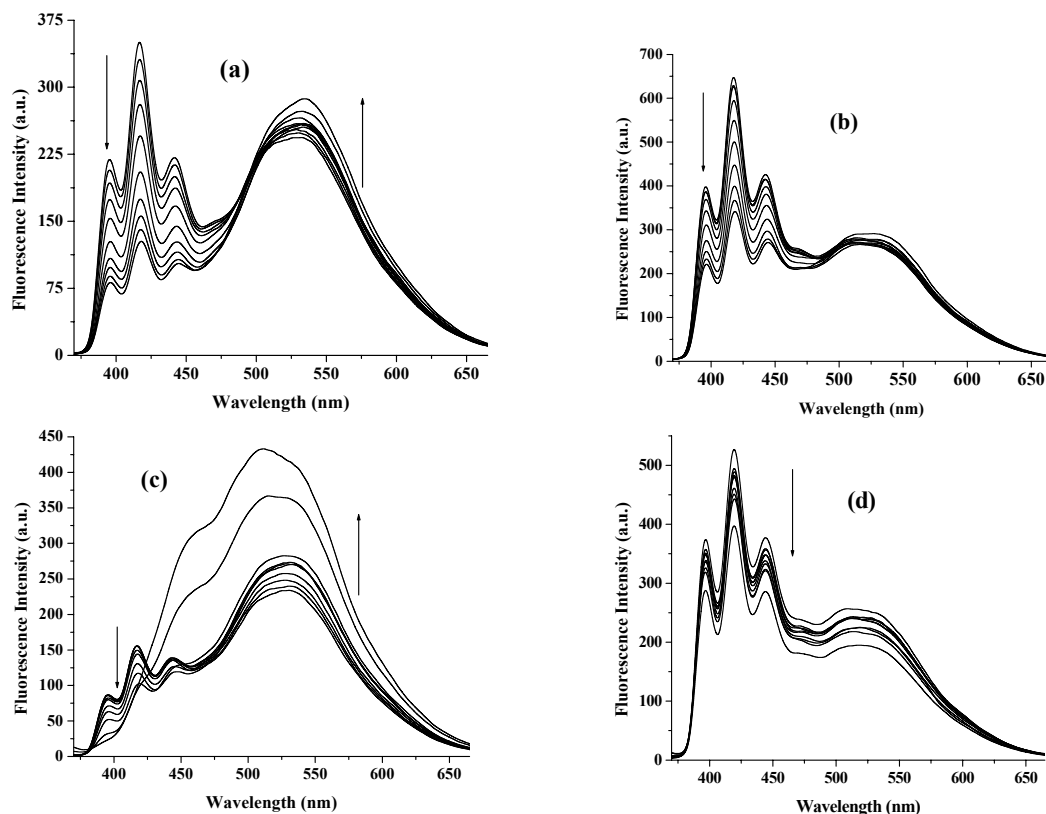

**Fig. S3** Effect of addition of water on the emission spectra of **1** in different solvents (a)  $\text{CH}_3\text{CN}$ , (b)  $\text{CHCl}_3$ , (c)  $\text{CH}_3\text{OH}$  and (d) THF.

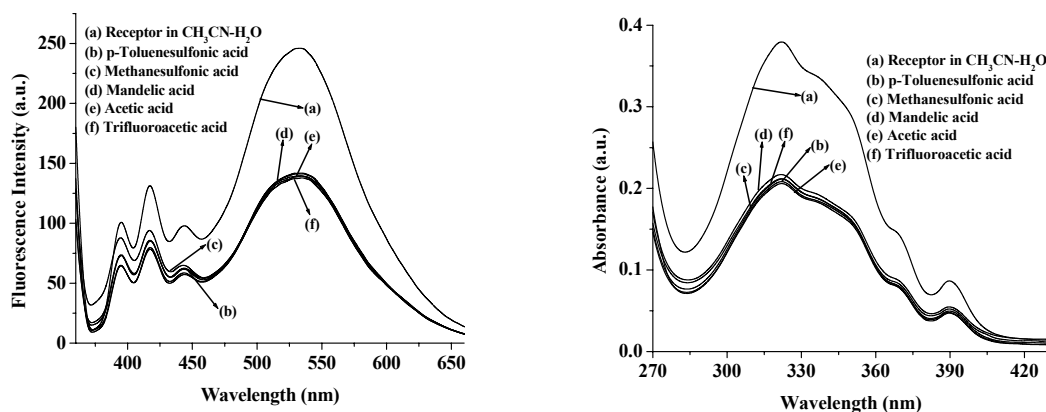

**Fig. S4** Emission spectra of **1** ( $c = 9.95 \times 10^{-6} \text{ M}$ ) in aq.  $\text{CH}_3\text{CN}$  upon addition of 40 equivalent amounts of the acids ( $\lambda_{\text{ex}} = 350 \text{ nm}$ ).

**Fig. S5** Absorption spectra of **1** ( $c = 9.95 \times 10^{-6} \text{ M}$ ) in aq.  $\text{CH}_3\text{CN}$  upon addition of 40 equivalent amounts of the acids ( $\lambda_{\text{ex}} = 350 \text{ nm}$ ).

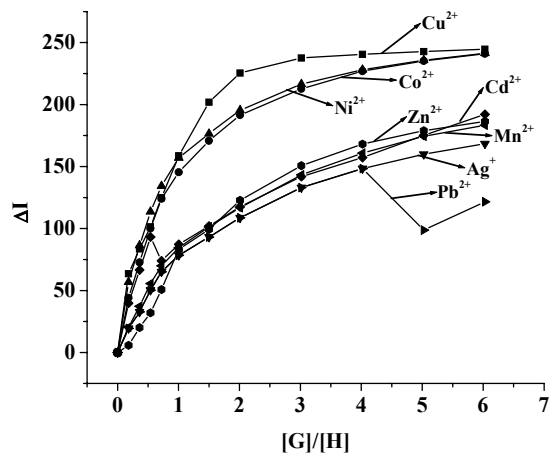

Fig. S6 Stoichiometry plots of receptor 1 with metal ions in CH<sub>3</sub>CN.
